# Supplementary material for: The Overexpression of Peanut (Arachis hypogaea L.) AhALDH2B6 in Soybean Enhances Cold Resistance
Source: MDPI journal article supplement (doi:10.3390/plants12162928), 2023-08-12
Supplement: s1 [file s1]

## Supplementary Materials

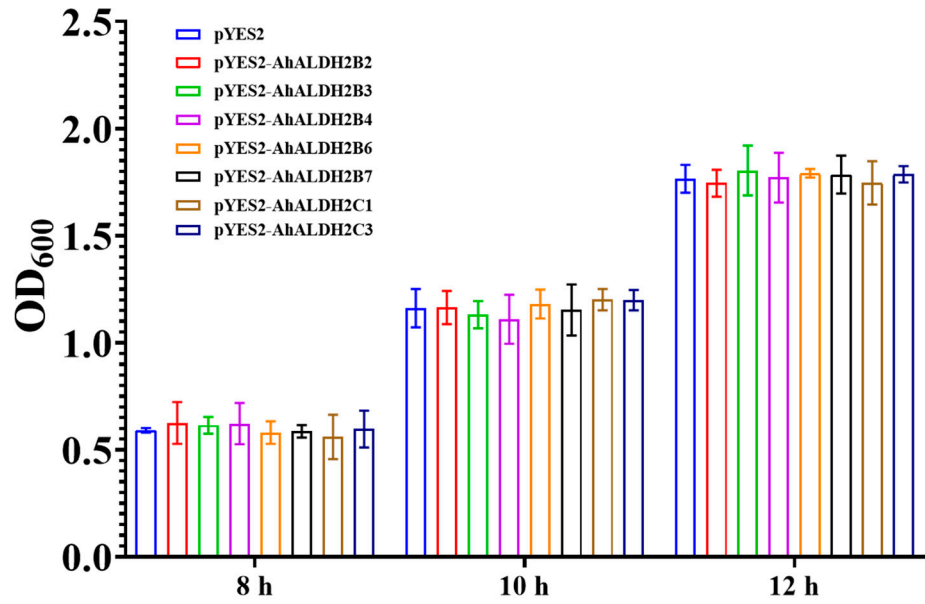

**Figure S1.** OD<sub>600</sub> values of yeast cells at different time points under normal culture conditions.

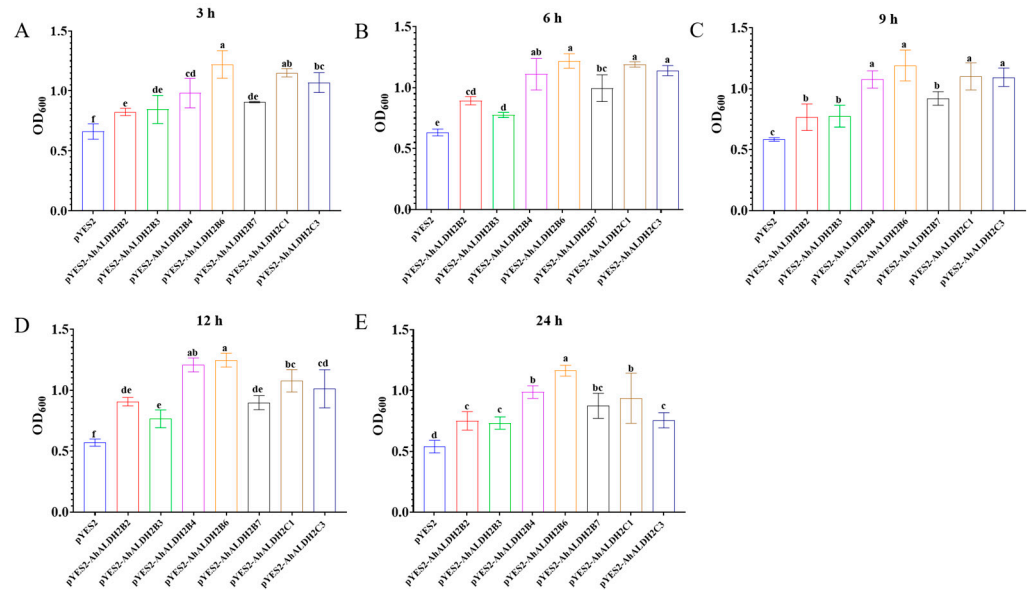

**Figure S2.** OD<sub>600</sub> values after 8 h of resuscitation at low temperature after various treatment times. Values with different superscripts are significantly different ( $P < 0.05$ )

**Table S1.** Primers used in this study.

| Primer Name | Sequence 5'to 3'                                 |
|-------------|--------------------------------------------------|
| AhALDH2B6-F | ACGGGGGACTCTTGAATGACAGCCTATGAAAGGCCAAAG          |
| AhALDH2B6-R | GGGGAAATTCGAGCTCTAAAGCCAAGCAGGGTCTTC             |
| AhALDH2B2-F | gggaatattaagcttggtaccATGAAGATGTTTATGGGTGGCC      |
| AhALDH2B2-R | tgatggatatctgcagaattcCCTCTCCTTTGGCATTGCTG        |
| AhALDH2B3-F | gggaatattaagcttggtaccATGGCTGTTAGAATTCTTTCGTCTC   |
| AhALDH2B3-R | tgatggatatctgcagaattcCTACAACCATGCTGGATTCTTCAA    |
| AhALDH2B4-F | gggaatattaagcttggtaccATGGGTTGTTGTAAGCCTACAATATT  |
| AhALDH2B4-R | tgatggatatctgcagaattcTCACTTATGTATTACTAAAGAATCCAT |

|                            |                                                |
|----------------------------|------------------------------------------------|
| AhALDH2B6-F2               | gggaatattaagcttggtaccATGACAGCCTATGAAAGGCAAAG   |
| AhALDH2B6-R2               | tgatggatatctgcagaattcCTAAAGCCAAGCAGGGTTCTTC    |
| AhALDH2B7-F                | gggaatattaagcttggtaccATGGCTGTTAGAATTCTTTCGTCTC |
| AhALDH2B7-R                | tgatggatatctgcagaattcCTACAACCATGCTGGATTCTTCAA  |
| AhALDH2C3-F                | gggaatattaagcttggtaccATGACAGCTCTTCCAACGGC      |
| AhALDH2C3-R                | tgatggatatctgcagaattcTCAAAGCCAAGGAGAATTGTATATG |
| <i>Bar</i> -F              | ATCGAGACAAGCACGGTCAA                           |
| <i>Bar</i> -R              | CTGAAGTCCAGCTGCCAGAA                           |
| <i>AhALDH2B6</i> -F3       | ATGACAGCCTATGAAAGGCAAAG                        |
| <i>AhALDH2B6</i> -R3       | CTAAAGCCAAGCAGGGTTCTTC                         |
| Arachis- <i>Actin11</i> -F | TTGGAATGGGTCAGAAGGATGC                         |
| Arachis- <i>Actin11</i> -R | AGTGGTGCCTCAGTAAGAAGC                          |
| <i>AhALDH2B1</i> -qPCR-F   | GTGGATTCTGCATCAGGGGAA                          |
| <i>AhALDH2B1</i> -qPCR-R   | TAGGCCAGGGTCCTTCATCA                           |
| <i>AhALDH2B2</i> -qPCR-F   | TGCGAGTTGTTTCAAATGCGT                          |
| <i>AhALDH2B2</i> -qPCR-R   | ACTTTGAACGCCGGATCTGA                           |
| <i>AhALDH2B3</i> -qPCR-F   | CCTTGCATGAGCCTATCGGT                           |
| <i>AhALDH2B3</i> -qPCR-R   | TGGTGTGCTCTGCAGTTT                             |
| <i>AhALDH2B4</i> -qPCR-F   | ATGGGGCTTTGAGTGGGTTG                           |
| <i>AhALDH2B4</i> -qPCR-R   | CGGGAGTGTCTGTGTGTTCT                           |
| <i>AhALDH2B5</i> -qPCR-F   | GGAATAGAGCAAGGTCCGCA                           |
| <i>AhALDH2B5</i> -qPCR-R   | CCACGCATTTCAAACGACT                            |
| <i>AhALDH2B6</i> -qPCR-F   | TCGAAACCGGGGAGATAGA                            |
| <i>AhALDH2B6</i> -qPCR-R   | GTCCATACCGCGTGTGTTTC                           |
| <i>AhALDH2B7</i> -qPCR-F   | CCTTGCATGAGCCTATCGGT                           |
| <i>AhALDH2B7</i> -qPCR-R   | TGGTGTCTGCTCTGCAGTTT                           |
| <i>AhALDH2B8</i> -qPCR-F   | AGGCAGAAGGGTTACAGCAT                           |
| <i>AhALDH2B8</i> -qPCR-R   | AGAAGAAGAAGGTGGTGCTC                           |
| <i>AhALDH2C1</i> -qPCR-F   | ACTGCTGGTGCTGCAGTAAG                           |
| <i>AhALDH2C1</i> -qPCR-R   | GCACATATTTCTCCCGCCTTC                          |
| <i>AhALDH2C2</i> -qPCR-F   | TGTTGACCTTGCTCTCTTCGG                          |
| <i>AhALDH2C2</i> -qPCR-R   | TTTTGCCTTCTCCACAACTTTTT                        |
| <i>AhALDH2C3</i> -qPCR-F   | TGCTGATCTTGCTCTCTTGGG                          |
| <i>AhALDH2C3</i> -qPCR-R   | TCCCTGAAATTCAAAGCCAACA                         |
| <i>AhALDH2C4</i> -qPCR-F   | TAGTCCAGCATTGGCTGCT                            |
| <i>AhALDH2C4</i> -qPCR-R   | TGAAGCTAACATTGAGCACACC                         |
| <i>AhALDH2C5</i> -qPCR-F   | GGATGTCTGCCTCACAAAGGA                          |
| <i>AhALDH2C5</i> -qPCR-R   | TGAGGGCAATGATGGACTGG                           |
| <i>AhALDH2C6</i> -qPCR-F   | ATATGGGTTAGCAGCGGGGA                           |
| <i>AhALDH2C6</i> -qPCR-R   | CATGTTTCCCGCGTGAGGT                            |
| <i>AhALDH2C7</i> -qPCR-F   | GATCTTGACAAAGCCGCTGA                           |
| <i>AhALDH2C7</i> -qPCR-R   | ACCAGCAGCACATATTTCTCCAA                        |
| <i>AhALDH2C8</i> -qPCR-F   | TGGGCATAGCATTCTTTCTTCC                         |
| <i>AhALDH2C8</i> -qPCR-R   | GGTGCCATCAGCTAGAATCCC                          |
| <i>AhALDH2C10</i> -qPCR-F  | AGACGCCATTGATGCTGGAA                           |
| <i>AhALDH2C10</i> -qPCR-R  | TGGATCTTATCGGCAGCACC                           |
| <i>AhALDH2C11</i> -qPCR-F  | TGAGAAGGCGAATAGCAGCA                           |
| <i>AhALDH2C11</i> -qPCR-R  | CTGCTCGGATGGACCTTGAC                           |
| qGmActin6-F                | CGGTGGTTCTATCTTGGCATC                          |
| qGmActin6-R                | GTCTTCGCTTCAATAACCCTA                          |

**Table S2.** Differentially expressed up-regulated and down-regulated genes.

| <b>Up-Regulated Gene</b> | <b>Down-Regulated Gene</b> |
|--------------------------|----------------------------|
| Glyma.16G170100          | Glyma.01G131100            |
| Glyma.09G185500          | Glyma.13G046300            |
| Glyma.10G189900          | Glyma.06G122600            |
| Glyma.10G246300          | Glyma.19G085100            |
| Glyma.16G210000          | Glyma.19G046300            |
| Glyma.13G347600          | Glyma.03G055100            |
| Glyma.01G119600          | Glyma.13G285400            |
| Glyma.13G237700          | Glyma.04G183100            |
| Glyma.15G128700          | Glyma.07G091600            |
| Glyma.10G193900          | Glyma.10G064900            |
| Glyma.05G207500          | Glyma.03G189600            |
| Glyma.08G014200          | Glyma.13G149700            |
| Glyma.14G141000          | Glyma.19G190000            |
| Glyma.05G208700          | Glyma.01G225100            |
| Glyma.12G088300          | Glyma.15G013300            |
| Glyma.03G189200          | Glyma.07G153100            |
| Glyma.17G008500          | Glyma.13G095000            |
| Glyma.08G362500          | Glyma.12G218300            |
| Glyma.09G010500          | Glyma.06G109200            |
| Glyma.05G198000          | Glyma.16G204600            |
